# Supplementary material
Source: PubMed Central journal article supplement (PMC1326237)
Supplement: nar_34_1_53__1.pdf [file nar_34_1_53__1.pdf]

**Supplementary figure 1: Automatic annotation procedure which has been used for the *Acinetobacter baylyi* ADP1 genome (1).**

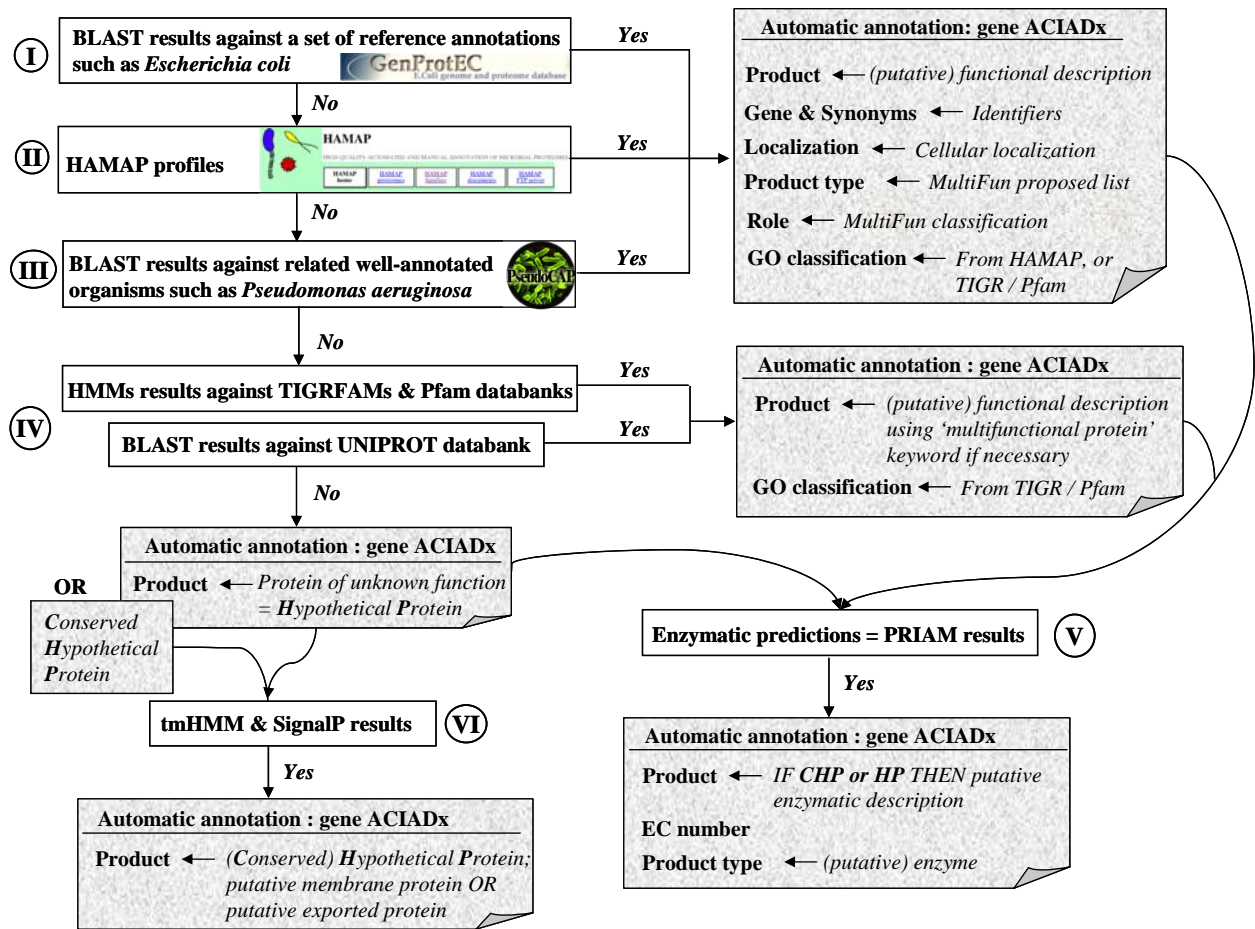

The first step of our procedure uses reference annotation data of the *Escherichia coli* genome (2,3) (I). If a significant match is found with this set of data, functional description and functional classes, gene names and synonyms are kept. Results from HAMAP functional assignments are then considered. For each well-defined (sub)family, a rule system describes the level and extent of annotations that can be assigned by similarity with a prototype manually-annotated entry (II). If no HAMAP family is assigned, pairwise comparisons with curated annotations of model organisms (such as *Pseudomonas aeruginosa*, or other related bacterial genomes) are evaluated (III). If no orthology relation exists, the program explores results against two protein domain databanks: TIGRFAMs (4) and Pfam (5). A hit is retained if the score is above the cutoff defined for each Hidden Markov Model (HMM). Priority is first given to TIGRFAMs results, and then, to those of Pfam (IV). In case of multiple non-overlapping HMM hit results, a modular protein annotation using the “multifunctional protein” keywords is created, as well as a concatenation of the different domain descriptions. If no valuable HMM hit exists, the blastP results against UNIPROT (6) are evaluated given priority to the curated Swiss-Prot annotations (IV). Only full-length matches with a high percent identity are considered and retained as a definitive or putative assignment. In all cases, assignment of Gene Ontology terms (7) is directly obtained from the InterProScan results and PRIAM results (8) are used to assign EC number(s) to genes described as (putative) enzymes (V). Finally, if the selected UNIPROT match is described as a “(conserved) hypothetical protein”, PRIAM results (if any) are checked to assign the description of the putative corresponding enzymatic function. If no PRIAM results exist, the

predicted protein is annotated as a “conserved hypothetical protein”. A protein with no blastP, HMM, or PRIAM matches remains a protein of unknown function. To complete the annotation, a (conserved) hypothetical protein is considered as “putative membrane protein” if at least three alpha-helical transmembrane regions have been retrieved by the tmHMM program (9), or as a “putative exported protein” if a signal peptide has been predicted by the SignalP program (10) (VI).

**Supplementary figure 2: Ordering supercontigs with synteny results.**

**A**

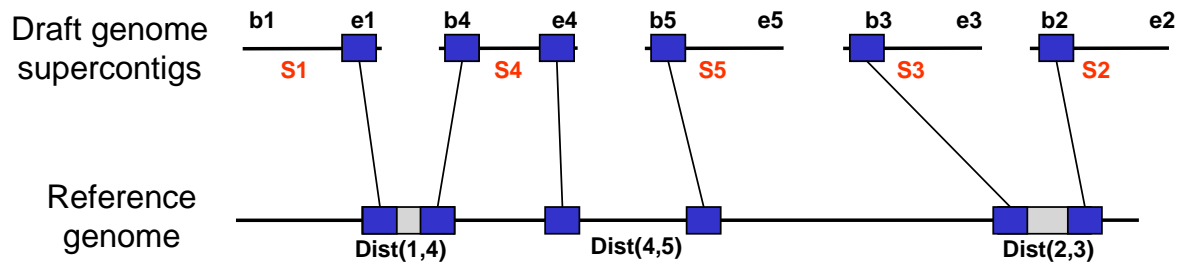

**B**

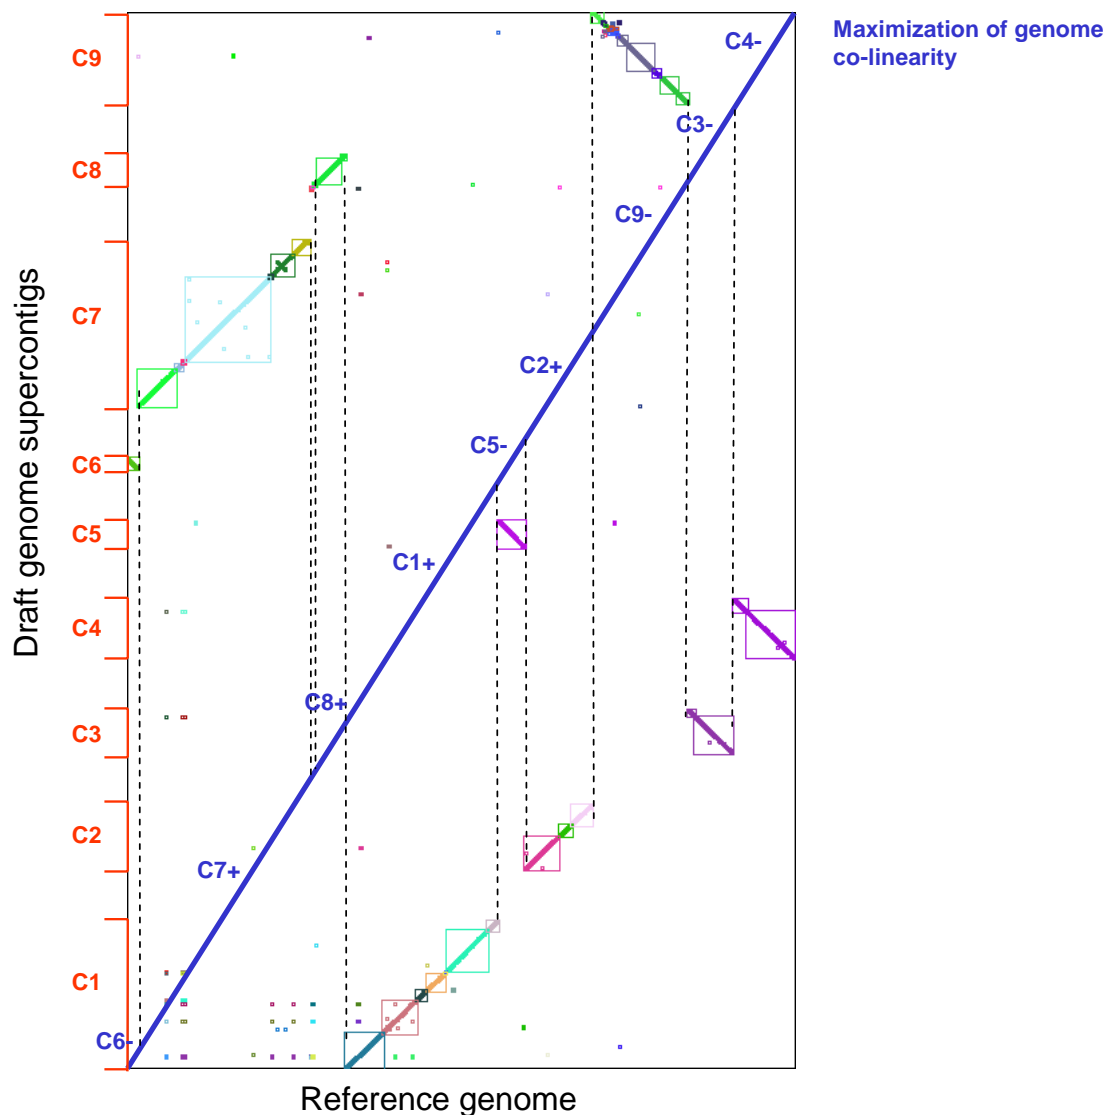

Two strategies relying on synteny results are used in MaGe to find one (or several) possible supercontig organizations of a draft genome.

**A.** A distance in bases is determined between two supercontigs in comparison with a reference genome. Synteny groups on the supercontig ends are mapped on the reference

genome and the minimal distance between pairs of supercontigs is then computed. If the distance is lower than a defined threshold, a link between the two supercontigs is retained. In this example, the link between supercontigs S1 and S4 and the one between S3 and S2 are kept. The S3 begin (b3) matches with the S2 begin (b2), so the reverse sequence of S3 can be associated with S2.

**B.** The second method also uses synteny results. The draft genome is made of 9 supercontigs (C1 to C9) and it is compared to a reference genome. Dotplot points represent gene correspondences between the two genomes (e.g. blastP similarity results). Points inside a rectangle which have the same color, symbolize a synteny group. Guided by this representation, the user can then order the supercontigs and assign their relative orientation. In this example, the proposed order is the following: C6-/C7+/C8+/C1+/C5-/C2+/C9-/C3-/C4- (plus and minus symbols refer to direct and reverse orientations of the supercontig).

### Supplementary figure 3: Structure of the MaGe web server

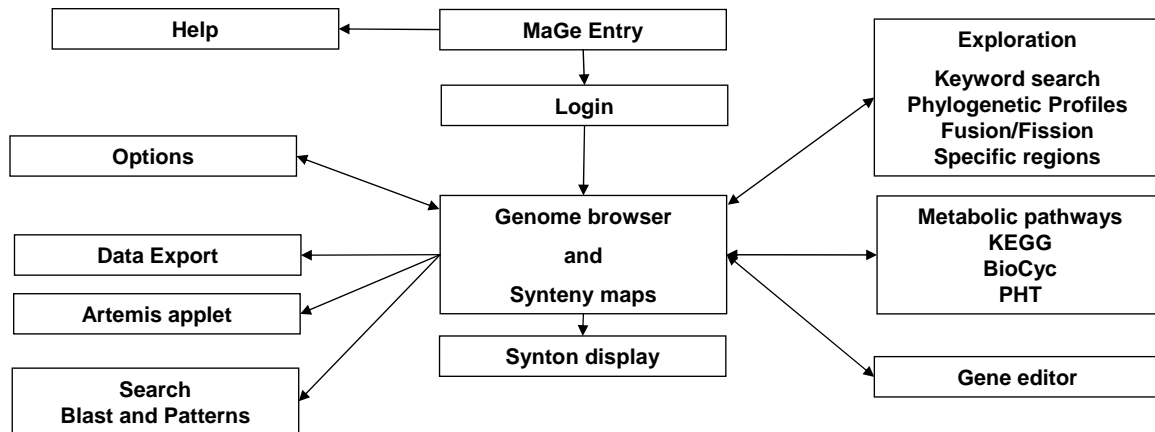

Starting from the ‘Genome browser’, users can navigate through web pages dealing with several functionalities and various aspects of annotations.

## Supplementary figure 4: MaGe's gene editor

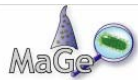

Gene Validation : CENIA1328 ( current annotation made by muller )

[PubMed](#) [KEGG](#) [BioCyc](#)

| Type                                  | Begin                                                                                                                                                                                                                                                                                                                                                                                                                                                                                                                                | End     | Length | Frame | Mutation | Gene | Synonyms             | Date                | Status                              |
|---------------------------------------|--------------------------------------------------------------------------------------------------------------------------------------------------------------------------------------------------------------------------------------------------------------------------------------------------------------------------------------------------------------------------------------------------------------------------------------------------------------------------------------------------------------------------------------|---------|--------|-------|----------|------|----------------------|---------------------|-------------------------------------|
| CDS                                   | 1346217                                                                                                                                                                                                                                                                                                                                                                                                                                                                                                                              | 1348307 | 2091   | +3    | no       | ligA | lig, dnaL, lop, pdeC | 2005-04-21 14:20:00 | finished                            |
| Note                                  | similar to DNA ligase, NAD-dependent (EC 6.5.1.2) from Burkholderia mallei (Pseudomonas mallei), swall : Q62JB9 (691 aa), Evalue = 9.11511e-259, %identity = 67.05, on 677 aa ; and similar to DNA ligase (EC 6.5.1.2) from Burkholderia pseudomallei (Pseudomonas pseudomallei), swall : Q63T07 (691 aa), Evalue = 2.03063e-258, %identity = 67.05, on 677 aa ; and similar to NAD-dependent DNA ligase (EC 6.5.1.2) from Azoarcus sp. (strain EbN1), swall : Q5NYU3 (681 aa), Evalue = 3.49602e-226, %identity = 62.44, on 662 aa. |         |        |       |          |      |                      |                     |                                     |
| Product                               | DNA ligase                                                                                                                                                                                                                                                                                                                                                                                                                                                                                                                           |         |        |       |          |      |                      |                     |                                     |
| Comments                              | This protein catalyzes the formation of phosphodiester linkages between 5'-phosphoryl and 3'-hydroxyl groups in double-stranded DNA using NAD as a coenzyme and as the energy source for the reaction. It is essential for DNA replication and repair of damaged DNA. CATALYTIC ACTIVITY: NAD+ + (deoxyribonucleotide)(n) + (deoxyribonucleotide)(m) = AMP + nicotinamide nucleotide + (deoxyribonucleotide)(n+m). SIMILARITY: Belongs to the NAD-dependent DNA ligase family. SIMILARITY:                                           |         |        |       |          |      |                      |                     |                                     |
| ECnumber                              | 6.5.1.2                                                                                                                                                                                                                                                                                                                                                                                                                                                                                                                              |         |        |       |          |      |                      |                     |                                     |
| PubmedID                              | 3018436                                                                                                                                                                                                                                                                                                                                                                                                                                                                                                                              |         |        |       |          |      |                      |                     |                                     |
| ProductType                           | e : enzyme                                                                                                                                                                                                                                                                                                                                                                                                                                                                                                                           |         |        |       |          |      |                      |                     |                                     |
| Localization                          | 2 : Cytoplasmic                                                                                                                                                                                                                                                                                                                                                                                                                                                                                                                      |         |        |       |          |      |                      |                     |                                     |
| Class                                 | 2a : Function of homologous gene experimentally demonstrated in an other organism                                                                                                                                                                                                                                                                                                                                                                                                                                                    |         |        |       |          |      |                      |                     |                                     |
| BioProcess                            | <input type="text"/> <input type="button" value="ADD"/> <input type="button" value="DEL"/>                                                                                                                                                                                                                                                                                                                                                                                                                                           |         |        |       |          |      |                      |                     |                                     |
| Roles                                 | <input type="text"/> <input type="button" value="ADD"/> <input type="button" value="DEL"/>                                                                                                                                                                                                                                                                                                                                                                                                                                           |         |        |       |          |      |                      |                     |                                     |
|                                       | 2.1.4 : DNA repair ; 7.1 : Cytoplasm ;                                                                                                                                                                                                                                                                                                                                                                                                                                                                                               |         |        |       |          |      |                      |                     |                                     |
| <input type="button" value="CANCEL"/> |                                                                                                                                                                                                                                                                                                                                                                                                                                                                                                                                      |         |        |       |          |      |                      |                     | <input type="button" value="SAVE"/> |

### Automatic Annotation : CENIA1328

| Type         | Begin                                                                                                                                                                                                                                                                                                                                                                                                                                                                                                                                | End     | Length | Frame | Mutation | Gene | Synonyms             | Date                | Status   |
|--------------|--------------------------------------------------------------------------------------------------------------------------------------------------------------------------------------------------------------------------------------------------------------------------------------------------------------------------------------------------------------------------------------------------------------------------------------------------------------------------------------------------------------------------------------|---------|--------|-------|----------|------|----------------------|---------------------|----------|
| CDS          | 1346217                                                                                                                                                                                                                                                                                                                                                                                                                                                                                                                              | 1348307 | 2091   | +3    | no       | ligA | lig, dnaL, lop, pdeC | 2005-05-10 00:00:00 | finished |
| Note         | similar to DNA ligase, NAD-dependent (EC 6.5.1.2) from Burkholderia mallei (Pseudomonas mallei), swall : Q62JB9 (691 aa), Evalue = 9.11511e-259, %identity = 67.05, on 677 aa ; and similar to DNA ligase (EC 6.5.1.2) from Burkholderia pseudomallei (Pseudomonas pseudomallei), swall : Q63T07 (691 aa), Evalue = 2.03063e-258, %identity = 67.05, on 677 aa ; and similar to NAD-dependent DNA ligase (EC 6.5.1.2) from Azoarcus sp. (strain EbN1), swall : Q5NYU3 (681 aa), Evalue = 3.49602e-226, %identity = 62.44, on 662 aa. |         |        |       |          |      |                      |                     |          |
| Product      | DNA ligase                                                                                                                                                                                                                                                                                                                                                                                                                                                                                                                           |         |        |       |          |      |                      |                     |          |
| Comments     | -                                                                                                                                                                                                                                                                                                                                                                                                                                                                                                                                    |         |        |       |          |      |                      |                     |          |
| ECnumber     | 6.5.1.2                                                                                                                                                                                                                                                                                                                                                                                                                                                                                                                              |         |        |       |          |      |                      |                     |          |
| PubmedID     | -                                                                                                                                                                                                                                                                                                                                                                                                                                                                                                                                    |         |        |       |          |      |                      |                     |          |
| ProductType  | -                                                                                                                                                                                                                                                                                                                                                                                                                                                                                                                                    |         |        |       |          |      |                      |                     |          |
| Localization | -                                                                                                                                                                                                                                                                                                                                                                                                                                                                                                                                    |         |        |       |          |      |                      |                     |          |
| Class        | -                                                                                                                                                                                                                                                                                                                                                                                                                                                                                                                                    |         |        |       |          |      |                      |                     |          |
| BioProcess   | -                                                                                                                                                                                                                                                                                                                                                                                                                                                                                                                                    |         |        |       |          |      |                      |                     |          |
| Roles        | 2.1.4 : DNA repair ; 7.1 : Cytoplasm ;                                                                                                                                                                                                                                                                                                                                                                                                                                                                                               |         |        |       |          |      |                      |                     |          |

[TrEMBL alignments](#) | [SwissProt alignments](#)

- ▶ All
- ▶ AMIGene ( 1 Results ordered by **Begin** )
- ▶ Duplications ( 0 Results ordered by **Eval** )
- ▶ E. coli Ecogene ( 1 Results ordered by **Eval** )
- ▶ B. subtilis ( 1 Results ordered by **Eval** )
- ▶ Acinetobacter ADP1 ( 1 Results ordered by **Eval** )
- ▶ Syntonomie ( 20 Results ordered by **NbGeneQ** )
- ▶ Syntonomie RefSeq ( 33 Results ordered by **NbGeneQ** )
- ▶ HAMAP ( 0 Results ordered by **H\_id** )
- ▶ Similarities SwissProt ( 10 Results ordered by **Eval** )
- ▶ Similarities TrEMBL ( 10 Results ordered by **Eval** )
- ▶ PRIAM EC number ( 1 Results ordered by **Evidence** )
- ▶ COGnitor ( 4 Results ordered by **Score** )
- ▶ InterProScan ( 20 Results ordered by **IP\_id** )
- ▶ SignalP ( 0 Results ordered by **SP\_proba** )
- ▶ TMhmm ( 0 Results ordered by **TM\_begin** )
- ▶ All

The MaGe's gene editor is used in the context of expert annotation. It is made of three main sections: 1. the 'Gene Validation' section allows the user to modify, delete and add information. Several fields are mandatory such as 'Product', 'ProductType' (11), 'ECnumber', 'Roles' (*i.e.*, functional categories which have been chosen by the group of annotators), 'Localization' (cellular localization) and 'Class' (*i.e.*, known protein, strong similarity with known protein, no significant database hit, etc). Other fields are optional such as 'Comments' (free text), 'BioProcess' (biological processes), and 'PubmedID' (this field may contain the PubMed identification number(s) of any publication describing a biological function experimentally verified). Most of these fields are constrained by controlled vocabulary in order to provide annotation consistency and interoperability between genome annotation projects; 2. the 'Automatic Annotation' section contains the results from the automatic procedure described in the 'Automatic functional assignments' section; 3. the last section gives access to a summary of available tool results, including Blast alignments (see text). Primary information for the ORF CENIA1328 (*Cenibacterium arsenoxidans ligA* gene) is presented in separate tables. This includes gene prediction (AMIGene) and duplication results, similarity results against (i) annotation data from reference genomes (*E. coli*, *B. subtilis* and *Acinetobacter ADP1*), (ii) Swiss-Prot curated annotations and TrEMBL databank (only the ten best hits are kept), (iii) synteny results using PkGDB curated proteomes (about 100 to date) and complete prokaryotic genomes stored in the NCBI RefSeq section (about 240 to date). Other tables include enzymatic function predictions (PRIAM results), similarity results against COG (COGnitor), protein domain databanks (InterProScan). External links to useful Websites are provided, together with links to PubMed, KEGG, and the CeniCyc metabolic pathway(s) involving the encoded enzyme (EC 6.5.1.2 here, 'BioCyc' link).

A specific annotation can be saved using several statuses: 'in progress' (*i.e.*, the first step of expert work is not finished), 'finished' (*i.e.*, the first check of the automatic annotation is now complete), 'curated' (*i.e.*, the annotation has been modified during an expert analysis dedicated to biological process annotation). When a gene seems to be wrongly predicted, the user can select the 'Artefact' status (these genes are removed from the set of annotations before submission to public databanks). Finally, the 'CheckSeq' status is used when a sequence error is suspected (reads corresponding to these genes have to be checked for errors in the assembly).

## Supplementary figure 5: MaGe data exploration.

A

Exploration : Acinetobacter baumannii R AYE chromosome ABAUR 69

MaGe

Exploration : Acinetobacter baumannii R AYE chromosome ABAUR 69

KeyWords PhyloProfile Synteny Specific Regions PkGDB Fusion Fission

Look for genes of :  
Acinetobacter baumannii R AYE chromosome ABAUR 69

In Synteny with : [Optional] No Hit with :

PkGDB Organisms

- Acinetobacter baumannii R AYE chromosome ABAUR
- Acinetobacter baumannii R AYE plasmid p3ABAU
- Acinetobacter baumannii S SDF chromosome ABAUS
- Acinetobacter baumannii S SDF plasmid p2ABAUS
- Acinetobacter sp. ADP1 chromosome ACIAD
- Escherichia coli K12 K-12 chromosome EG NC\_000913
- Psychrobacter sp 253-4 chromosome PSY

NCBI RefSeq Organisms

- A. aeolicus VF5 NC\_000918
- A. fulgidus DSM 4304 NC\_000917
- A. permix K1 NC\_000854
- A. tumefaciens C58 chr. circular NC\_003062
- A. tumefaciens C58 chr. circular NC\_003304
- A. tumefaciens C58 chr. linear NC\_003063
- A. tumefaciens C58 chr. linear NC\_003305
- A. tumefaciens C58 pl. AT NC\_003064
- A. tumefaciens C58 pl. AT NC\_003306
- A. tumefaciens C58 pl. TI NC\_003065

PkGDB Organisms

- Acinetobacter baumannii R AYE chromosome ABAUR
- Acinetobacter baumannii R AYE plasmid p3ABAU
- Acinetobacter baumannii S SDF chromosome ABAUS
- Acinetobacter baumannii S SDF plasmid p2ABAUS
- Acinetobacter sp. ADP1 chromosome ACIAD
- Escherichia coli K12 K-12 chromosome EG NC\_000913
- Psychrobacter sp 253-4 chromosome PSY

NCBI RefSeq Organisms

- P. aeruginosa PAO1 NC\_002516
- P. furiosus DSM 3638 NC\_003413
- P. gingivalis W83 NC\_002950
- P. horikoshii OT3 NC\_000961
- P. luminescens laumondii TTO1 NC\_005126
- P. marinus MIT 9313 NC\_005071
- P. marinus marinus CCMP1375 NC\_005042
- P. marinus pastoris CCMP1986 NC\_005072
- P. multocida multocida Pm70 NC\_002663
- P. putida KT2440 NC\_002947

B

Exploration : Acinetobacter baumannii R AYE chromosome ABAUR 69

MaGe

Exploration : Acinetobacter baumannii R AYE chromosome ABAUR 69

KeyWords PhyloProfile Synteny Specific Regions PkGDB Fusion Fission

Genes of Acinetobacter baumannii R AYE chromosome ABAUR 69

In synteny with:

Acinetobacter baumannii S SDF chromosome ABAUS  
Acinetobacter sp. ADP1 chromosome ACIAD

And no hits with:

Psychrobacter sp 253-4 chromosome PSY  
P. aeruginosa PAO1 NC\_002516  
P. putida KT2440 NC\_002947

( 545 Results )

| Label    | Gene | Product                                                | Acinetobacter baumannii S SDF chromosome ABAUS | Acinetobacter sp. ADP1 chromosome ACIAD |
|----------|------|--------------------------------------------------------|------------------------------------------------|-----------------------------------------|
| ABAU0002 | -    | conserved hypothetical protein                         | No Hit                                         | 89_36_856_858                           |
| ABAU0010 | -    | putative general secretion pathway protein G precursor | Similarity<br>89_72_1_88                       | 89_36_856_858                           |
| ABAU0039 | -    | conserved hypothetical protein; putative dehydratase   | 89_72_1_88                                     | 89_36_856_858                           |
| ABAU0049 | -    | conserved hypothetical protein                         | Similarity<br>89_72_1_88                       | 89_36_892_895                           |
| ABAU0050 | -    | hypothetical protein; putative signal peptide          | 89_72_1_88                                     | No Hit                                  |

Two screenshots of MaGe ‘Exploration’ functionality are shown as examples of the use of ‘PhyloProfile/Synteny’ search.



- A.** Selecting the ‘PhyloProfile/Synteny’ section, the user can search for genes of *Acinetobacter baumannii* AYE which are homologs to genes in certain organisms (*Acinetobacter* ADP1 and *A. baumannii* SDF) and exclude those that are homologs to genes in other organisms (*Psychrobacter* sp. 253-4, *Pseudomonas aeruginosa* and *P. putida*).
- B.** The query output is a list of 545 *A. baumannii* AYE genes. The user can then explore gene groups which are specific to the *Acinetobacter* genus and have a same chromosomal organization (colored rectangles symbolize synteny groups)

## Supplementary figure 6: Setting up a new annotation project: an example.

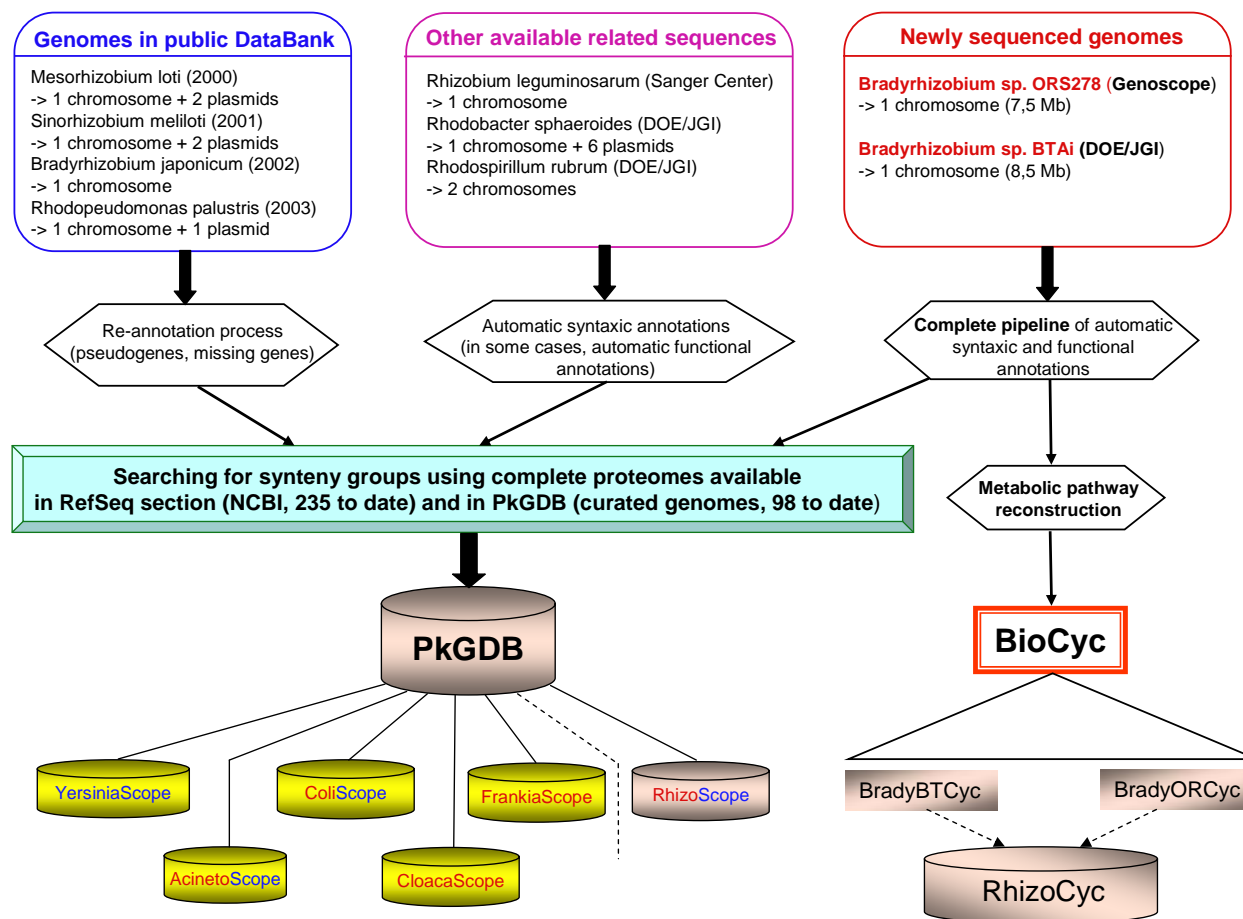

To set up a new annotation project (here the annotation of two new *Bradyrhizobium* species) the first step consists in gathering the available genomic sequences from organisms of interest in PkgDB. These sequences are submitted to various procedures (lozenges), which end with the

computation of synteny groups with the set of complete prokaryotic proteomes. A new thematic database is then created (here RhizoScope), the data of which are partly publicly available (*i.e.*, only data corresponding to genomes already stored in public DataBanks; blue colour of the word 'Scope'). As shown in this figure, some thematic databases are only accessible by the group of experts (*i.e.*, FrankiaScope, CloacaScope in red), and others are freely available (*i.e.*, YersiniaScope in blue). The RhizoScope database contains links to the BradyBTCyc and BradyORCyc metabolic databases which have been built using the BioCyc software. In addition we have recently integrated these metabolic data in the relational scheme of BioWareHouse (MySQL database system; <http://bioinformatics.ai.sri.com/biowarehouse>). The corresponding database (here RhizoCyc) is very useful for analysis of metabolic content of the compared genomes. Metabolic databases can be accessed at <http://www.genoscope.cns.fr/agc/microcyc>.

## References

1. Barbe, V., Vallenet, D., Fonknechten, N., Kreimeyer, A., Oztas, S., Labarre, L., Cruveiller, S., Robert, C., Duprat, S., Wincker, P. *et al.* (2004) Unique features revealed by the genome sequence of *Acinetobacter* sp. ADP1, a versatile and naturally transformation competent bacterium. *Nucleic Acids Res*, **32**, 5766-5779.
2. Rudd, K.E. (2000) EcoGene: a genome sequence database for *Escherichia coli* K-12. *Nucleic Acids Res*, **28**, 60-64.
3. Serres, M.H., Goswami, S. and Riley, M. (2004) GenProtEC: an updated and improved analysis of functions of *Escherichia coli* K-12 proteins. *Nucleic Acids Res*, **32**, D300-302.
4. Haft, D.H., Selengut, J.D. and White, O. (2003) The TIGRFAMs database of protein families. *Nucleic Acids Res*, **31**, 371-373.
5. Bateman, A., Coin, L., Durbin, R., Finn, R.D., Hollich, V., Griffiths-Jones, S., Khanna, A., Marshall, M., Moxon, S., Sonnhammer, E.L. *et al.* (2004) The Pfam protein families database. *Nucleic Acids Res*, **32**, D138-141.
6. Bairoch, A., Apweiler, R., Wu, C.H., Barker, W.C., Boeckmann, B., Ferro, S., Gasteiger, E., Huang, H., Lopez, R., Magrane, M. *et al.* (2005) The Universal Protein Resource (UniProt). *Nucleic Acids Res*, **33**, D154-159.
7. Harris, M.A., Clark, J., Ireland, A., Lomax, J., Ashburner, M., Foulger, R., Eilbeck, K., Lewis, S., Marshall, B., Mungall, C. *et al.* (2004) The Gene Ontology (GO) database and informatics resource. *Nucleic Acids Res*, **32**, D258-261.
8. Claudel-Renard, C., Chevalet, C., Faraut, T. and Kahn, D. (2003) Enzyme-specific profiles for genome annotation: PRIAM. *Nucleic Acids Res*, **31**, 6633-6639.
9. Krogh, A., Larsson, B., von Heijne, G. and Sonnhammer, E.L. (2001) Predicting transmembrane protein topology with a hidden Markov model: application to complete genomes. *J Mol Biol*, **305**, 567-580.
10. Bendtsen, J.D., Nielsen, H., von Heijne, G. and Brunak, S. (2004) Improved prediction of signal peptides: SignalP 3.0. *J Mol Biol*, **340**, 783-795.
11. Serres, M.H. and Riley, M. (2000) MultiFun, a multifunctional classification scheme for *Escherichia coli* K-12 gene products. *Microb Comp Genomics*, **5**, 205-222.
